# Supplementary material for: Participants, Usage, and Use Patterns of a Web-Based Intervention for the Prevention of Depression Within a Randomized Controlled Trial
Source: J Med Internet Res. 2013 Aug 20;15(8):e172. doi: 10.2196/jmir.2258 (PMC3757912; doi:10.2196/jmir.2258)
Supplement: Supplementary file 3 [file jmir_v15i8e172_app3.pdf]

## Multimedia Appendix 3 – Characteristics of respondents for analyses of usage patterns

Table MA3.1 - Demographics, lesson reached and randomized group of arbitrarily selected participants for analyses of usage patterns

| No. | Lesson reached | Group | Gender | Age | Education | Internet usage (h/day) | Internet experience |
|-----|----------------|-------|--------|-----|-----------|------------------------|---------------------|
| 1   | 3              | 7     | female | 23  | high      | 2                      | 6                   |
| 2   | 3              | 5     | male   | 46  | medium    | 8                      | 8                   |
| 3   | 3              | 7     | female | 34  | low       | 3                      | 6                   |
| 4   | 3              | 2     | female | 42  | high      | 5                      | 6                   |
| 5   | 4              | 4     | male   | 53  | high      | 2                      | 5                   |
| 6   | 6              | 8     | female | 60  | medium    | 2                      | 7                   |
| 7   | 6              | 7     | male   | 44  | high      | 8                      | 6                   |
| 8   | 6              | 4     | male   | 56  | high      | 1                      | 6                   |
| 9   | 7              | 3     | female | 66  | high      | 4                      | 3                   |
| 10  | 7              | 1     | female | 40  | medium    | 3                      | 5                   |
| 11  | 9              | 6     | female | 50  | high      | 1.5                    | 7                   |
| 12  | 9              | 5     | female | 73  | high      | 0.5                    | 3                   |
| 13  | 9              | 8     | female | 51  | high      | 1                      | 7                   |
| 14  | 9              | 4     | male   | 63  | medium    | 4                      | 6                   |
| 15  | 9              | 5     | female | 44  | high      | 0.5                    | 2                   |
| 16  | 9              | 8     | male   | 60  | high      | 2                      | 4                   |
| 17  | 9              | 4     | male   | 35  | high      | 5                      | 7                   |
| 18  | 9              | 5     | female | 36  | medium    | 1                      | 3                   |
| 19  | 9              | 3     | female | 29  | high      | 2                      | 6                   |
| 20  | 9              | 4     | male   | 42  | high      | 6                      | 8                   |
